# Supplementary material
Source: publisher figshare collection journal article supplement (https://tandf.figshare.com/ndownloader/files/14386208)
Supplement: Supplementary file 1 [file 14386208]

**Supporting Information:**

**An efficient heterogeneous gold(I)-catalyzed intermolecular cycloaddition of 2-aminoaryl carbonyls and internal alkynes leading to polyfunctionalized quinolines**

Wenli Hu,*a* Weisen Yang,*a,b* Tao Yan*a* and Mingzhong Cai*a**

a Key Laboratory of Functional Small Organic Molecule, Ministry of Education and College of Chemistry & Chemical Engineering, Jiangxi Normal University, Nanchang 330022, China

b Fujian Key Laboratory of Eco-Industrial Green Technology, College of Ecology and Resources Engineering, Wuyi University, Wuyishan 354300, China

E-mail: caimzhong@163.com

**General procedure for the heterogeneous Au(I)-catalyzed synthesis of quinolines:**

To a solution of 2-aminoaryl carbonyl **1** (0.5 mmol), MCM-41-PPh3-AuCl (128 mg, 0.05 mmol), AgOTf (12.9 mg, 0.05 mmol) in DMF (5 mL) was added internal alkyne **2** (0.75 mmol) under Ar. The reaction mixture was stirred at 100 ºC for 4 h (TLC monitored). The resulting mixture was then diluted with ethyl acetate (20 mL) and filtered. The gold catalyst was washed with NH3·H2O (2 × 5 mL), distilled water (5 mL), and acetone (2 × 5 mL) and reused in the next run. The filtrate was washed with water (2 × 10 mL) and brine (2 × 10 mL), and the organic layers were dried over MgSO4, filtered, and concentrated under reduced pressure. The residue was purified by chromatography on silica gel (eluent: petroleum ether/ethyl acetate = 15/1) to afford the desired product **3**.

Ethyl 2-phenylquinoline-3-carboxylate (**3a**).[1] Light yellow oil. Yield: 86%. 1H NMR (400 MHz, CDCl3): *δ* 8.65 (s, 1H), 8.19 (d, *J* = 8.4 Hz, 1H), 7.92 (d, *J* = 8.0 Hz, 1H), 7.83-7.81 (m, 1H), 7.66-7.57 (m, 3H), 7.52-7.42 (m, 3H), 4.19 (q, *J* = 7.2 Hz, 2H), 1.08 (t, *J* = 7.0 Hz, 3H); 13C NMR (100 MHz, CDCl3): *δ* 168.0, 158.2, 148.4, 140.8, 139.1, 131.5, 129.6, 128.6, 128.5, 128.2, 128.1, 127.2, 125.9, 125.6, 61.5, 13.7.

Ethyl 4-methyl-2-phenylquinoline-3-carboxylate (**3b**).[2]Light yellow solid. Yield: 91%. Mp 59–61 °C. 1H NMR (400 MHz, CDCl3): *δ* 8.17 (d, *J* = 8.4 Hz, 1H), 8.08 (d, *J* = 8.0 Hz, 1H), 7.80-7.73 (m, 1H), 7.70-7.66 (m, 2H), 7.63-7.58 (m, 1H), 7.50-7.40 (m, 3H), 4.15 (q, *J* = 7.2Hz, 2H), 2.76 (s, 3H), 1.01 (t, *J* = 7.2 Hz, 3H); 13C NMR (100 MHz, CDCl3): *δ* 169.1, 156.3, 147.3, 142.7, 140.7, 130.3, 128.7, 128.4, 128.3, 127.5, 127.0, 126.1, 124.1, 61.6, 15.7, 13.6.

Ethyl 2,4-diphenylquinoline-3-carboxylate (**3c**).[2] Light yellow solid. Yield: 90%. Mp 85–87 °C. 1H NMR (400 MHz, CDCl3): *δ* 8.23 (d, *J* = 8.4 Hz, 1H), 7.79-7.73 (m, 3H), 7.61 (d, *J* = 8.4 Hz, 1H), 7.52-7.39 (m, 9H), 3.87 (q, *J* = 7.2 Hz, 2H), 0.81 (t, *J* = 7.2 Hz, 3H); 13C NMR (100 MHz, CDCl3): *δ* 168.2, 156.0, 147.9, 147.1, 140.3, 135.6, 130.5, 129.8, 129.4, 128.9, 128.6, 128.5, 128.4, 128.2, 127.2, 127.1, 126.6, 125.6, 61.3, 13.4.

Ethyl 2-phenyl-4-(*p*-tolyl)quinoline-3-carboxylate (**3d**).[2] Light yellow solid. Yield: 87%. Mp 86–88 °C. 1H NMR (400 MHz, CDCl3): *δ* 8.22 (d, *J* = 8.4 Hz, 1H), 7.76-7.72 (m, 2H), 7.67-7.63 (m, 1H), 7.56 (d, *J* = 8.4 Hz, 1H), 7.51-7.43 (m, 4H), 7.30 (s, 4H), 3.88 (q, *J* = 7.2 Hz, 2H), 2.45 (s, 3H), 0.83 (t, *J* = 7.2 Hz, 3H); 13C NMR (100 MHz, CDCl3): *δ* 168.3, 156.0, 147.9, 147.3, 140.3, 138.3, 132.5, 130.4, 129.8, 129.3, 128.9, 128.8, 128.7, 128.6, 128.4, 127.0, 126.7, 125.8, 61.2, 21.4, 13.4.

Ethyl 4-(4-chlorophenyl)-2-phenylquinoline-3-carboxylate (**3e**).[2] Light yellow oil. Yield: 81%. 1H NMR (400 MHz, CDCl3): *δ* 8.23 (d, *J* = 8.4 Hz, 1H), 7.78-7.72 (m, 3H), 7.56 (d, *J* = 8.0 Hz, 1H), 7.52-7.43 (m, 6H), 7.36 (d, *J* = 8.4 Hz, 2H), 3.90 (q, *J* = 7.2 Hz, 2H), 0.85 (t, *J* = 7.2 Hz, 3H); 13C NMR (100 MHz, CDCl3): *δ* 168.0, 156.0, 147.8, 145.8, 140.1, 134.8, 134.0, 130.9, 130.6, 130.5, 130.0, 129.0, 128.6, 128.5, 128.4, 127.3, 126.2, 125.3, 61.4, 13.5.

Ethyl 4-(naphthalen-2-yl)-2-phenylquinoline-3-carboxylate (**3f**). Light yellow oil. Yield: 78%. 1H NMR (400 MHz, CDCl3): *δ* 8.25 (d, *J* = 8.4 Hz, 1H), 7.98 (d, *J* = 8.4 Hz, 1H), 7.96-7.92 (m, 1H), 7.90-7.85 (m, 2H), 7.79-7.74 (m, 3H), 7.65-7.60 (m, 1H), 7.59-7.52 (m, 3H), 7.50-7.42 (m, 4H), 3.80 (q, *J* = 7.2, 2H), 0.71 (t, *J* = 7.2 Hz, 3H); 13C NMR (100 MHz, CDCl3): *δ* 168.2, 156.1, 147.9, 147.1, 140.3, 133.1, 133.0, 132.9, 130.5, 129.9, 128.9, 128.7, 128.6, 128.4, 128.2, 127.9, 127.8, 127.5, 127.3, 127.1, 126.7, 126.6, 125.7, 61.3, 13.4. HRMS calcd for C28H22NO2+ [M+H]+: 404.1651, found 404.1648.

Ethyl 6-fluoro-2,4-diphenylquinoline-3-carboxylate (**3g**). Light yellow solid. Yield: 83%. Mp 75–77 °C. 1H NMR (400 MHz, CDCl3): *δ* 8.23 (dd, *J* = 9.2, 5.2 Hz, 1H), 7.75-7.72 (m, 2H), 7.54-7.37 (m, 9H), 7.24-7.20 (m, 1H), 3.88 (q, *J* = 7.2 Hz, 2H), 0.82 (t, *J* = 7.2 Hz, 3H); 13C NMR (100 MHz, CDCl3): *δ* 168.0, 160.9 (d, 1*J*C-F= 247.3 Hz), 155.4, 146.6 (d, 4*J*C-F = 5.7 Hz), 145.0, 140.0, 135.1, 132.4 (d, 3*J*C-F = 9.1 Hz), 129.3, 129.0, 128.8, 128.6, 128.5, 128.4, 127.8, 126.6 (d, 3*J*C-F = 9.6 Hz), 120.8 (d, 2*J*C-F = 25.7 Hz), 109.9 (d, 2*J*C-F = 23.3 Hz), 61.4, 13.4. HRMS calcd for C24H19FNO2+ [M+H]+: 372.1400, found 372.1408.

Ethyl 6-chloro-2,4-diphenylquinoline-3-carboxylate (**3h**).[2] Light yellow solid. Yield: 82%. Mp 106–108 °C. 1H NMR (400 MHz, CDCl3): *δ* 8.16 (d, *J* = 9.2 Hz, 1H), 7.74 (d, *J* = 7.6 Hz, 2H), 7.71 (d, *J* = 8.8 Hz, 1H), 7.57 (d, *J* = 2.0 Hz, 1H), 7.54-7.49 (m, 3H), 7.48-7.44 (m, 3H), 7.42-7.37 (m, 2H), 3.88 (t, *J* = 7.2 Hz, 2H), 0.81 (t, *J* = 7.2 Hz, 3H); 13C NMR (100 MHz, CDCl3): *δ* 167.8, 156.3, 146.4, 146.3, 139.8, 134.9, 133.1, 131.5, 131.4, 129.4, 129.1, 128.9, 128.6, 128.5, 128.4, 128.0, 126.4, 125.3, 61.4, 13.4.

Ethyl 2-(*p*-tolyl)quinoline-3-carboxylate (**3i**).[1] Light yellow solid. Yield: 91%. Mp 55–57 °C. 1H NMR (400 MHz, CDCl3): *δ* 8.61 (s, 1H), 8.17 (d, *J* = 8.4 Hz, 1H), 7.90 (d, *J* = 8.0 Hz, 1H), 7.82-7.77 (m, 1H), 7.58 (t, *J* = 7.6 Hz, 1H), 7.54 (d, *J* = 8.0 Hz, 2H), 7.27 (d, *J* = 8.4 Hz, 2H), 4.22 (q, *J* = 7.2 Hz, 2H), 2.42 (s, 3H), 1.13 (t, *J* = 7.2 Hz, 3H); 13C NMR (100 MHz, CDCl3): *δ* 168.2, 158.1, 148.4, 138.9, 138.5, 137.8, 131.4, 129.5, 128.9, 128.6, 128.2, 127.1, 125.8, 125.6, 61.5, 21.4, 13.8.

Ethyl 2-(4-methoxyphenyl)quinoline-3-carboxylate (**3j**).[1] Light yellow oil. Yield: 92%. 1H NMR (400 MHz, CDCl3): *δ* 8.59 (s, 1H), 8.16 (d, *J* = 8.4 Hz, 1H), 7.89 (d, *J* = 8.4 Hz, 1H), 7.82-7.76 (m, 1H), 7.61 (d, *J* = 8.8 Hz, 2H), 7.57 (t, *J* = 7.6 Hz, 1H), 7.00 (d, *J* = 8.8 Hz, 2H), 4.24 (q, *J* = 7.2 Hz, 2H), 3.87 (s, 3H), 1.16 (t, *J* = 7.2 Hz, 3H); 13C NMR (100 MHz, CDCl3): *δ* 168.3, 160.2, 157.5, 148.4, 138.9, 133.2, 131.4, 130.1, 129.5, 128.2, 127.0, 125.7, 125.5, 113.7, 61.6, 55.4, 13.9.

Ethyl 2-(4-bromophenyl)quinoline-3-carboxylate (**3k**).[1] Light yellow solid. Yield: 84%. Mp 68–70 °C. 1H NMR (400 MHz, CDCl3): *δ* 8.68 (s, 1H), 8.17 (d, *J* = 8.4 Hz, 1H), 7.93 (d, *J* = 8.0 Hz, 1H), 7.83-7.80 (m, 1H), 7.65-7.57 (m, 3H), 7.54-7.49 (m, 2H), 4.23 (q, *J* = 7.2 Hz, 2H), 1.16 (t, *J* = 7.2 Hz, 3H); 13C NMR (100 MHz, CDCl3): *δ* 167.6, 157.0, 148.4, 139.8, 139.5, 131.8, 131.3, 130.3, 129.5, 128.3, 127.5, 126.0, 125.0, 123.1, 61.7, 13.8.

Ethyl 2-(4-nitrophenyl)quinoline-3-carboxylate (**3l**).[2] Light yellow solid. Yield: 79%. Mp 147–149 °C. 1H NMR (400 MHz, CDCl3): *δ* 8.80 (s, 1H), 8.34 (d, *J* = 8.8 Hz, 2H), 8.19 (d, *J* = 8.4 Hz, 1H), 7.98 (d, *J* = 8.0 Hz, 1H), 7.90-7.86 (m, 1H), 7.81-7.76 (m, 2H), 7.71-7.65 (m, 1H), 4.25 (q, *J* = 7.2 Hz, 2H), 1.17 (t, *J* = 7.2 Hz, 3H); 13C NMR (100 MHz, CDCl3): *δ* 166.7, 156.2, 148.4, 147.8, 147.3, 140.1, 132.3, 129.8, 129.7, 128.5, 128.1, 126.2, 124.5, 123.3, 61.8, 13.9.

Ethyl 2-(naphthalen-1-yl)quinoline-3-carboxylate (**3m**). Light yellow solid. Yield: 83%. Mp 77–80 °C. 1H NMR (400 MHz, CDCl3) δ 8.87 (s, 1H), 8.23 (d, *J* = 8.4 Hz, 1H), 8.02 (d, *J* = 7.6 Hz, 1H), 7.94-7.83 (m, 3H), 7.69-7.64 (m, 1H), 7.62-7.50 (m, 3H), 7.49-7.43 (m, 1H), 7.40-7.34 (m, 1H), 3.85 (q, *J* = 7.2 Hz, 2H), 0.65 (t, *J* = 7.2 Hz, 3H); 13C NMR (100 MHz, CDCl3): *δ* 166.8, 158.1, 148.7, 139.5, 139.1, 133.4, 131.9, 131.8, 129.6, 128.5, 128.4, 128.3, 127.5, 126.5, 126.3, 126.2, 125.8, 125.3, 125.1, 61.2, 13.1. HRMS calcd for C22H18NO2+ [M+H]+: 328.1338, found 328.1335.

Ethyl 2-methylquinoline-3-carboxylate (**3n**).[3] Light yellow solid. Yield: 87%. Mp 65–68 °C. 1H NMR (400 MHz, CDCl3): *δ* 8.73 (s, 1H), 8.04 (d, *J* = 8.4 Hz, 1H), 7.86 (d, *J* = 8.0 Hz, 1H), 7.80-7.76 (m, 1H), 7.56-7.51 (m, 1H), 4.45 (q, *J* = 7.2 Hz, 2H), 3.00 (s, 3H), 1.46 (t, *J* = 7.2 Hz, 3H); 13C NMR (100 MHz, CDCl3): *δ* 166.6, 158.5, 148.7, 139.9, 131.7, 128.6, 128.5, 126.5, 125.8, 124.0, 61.4, 25.7, 14.3.

1-(2-Phenylquinolin-3-yl)ethan-1-one (**3o**).[2] Light yellow solid. Yield: 75%. Mp 77–79 °C. 1H NMR (400 MHz, CDCl3): *δ* 8.38 (s, 1H), 8.20 (d, *J* = 8.4 Hz, 1H), 7.93 (d, *J* = 8.0 Hz, 1H), 7.84-7.80 (m, 1H), 7.70-7.65 (m, 2H), 7.63-7.57 (m, 1H), 7.53-7.47 (m, 3H), 2.15 (s, 3H); 13C NMR (100 MHz, CDCl3): *δ* 203.1, 156.9, 148.3, 140.3, 137.0, 134.8, 131.4, 129.5, 129.4, 129.2, 128.9, 128.4, 127.3, 126.1, 30.4.

Ethyl 4-methyl-2-(*p*-tolyl)quinoline-3-carboxylate (**3p**). Light yellow oil. Yield: 90%. 1H NMR (400 MHz, CDCl3): *δ* 8.15 (d, *J* = 8.4 Hz, 1H), 8.07 (d, *J* = 8.4 Hz, 1H), 7.78-7.72 (m, 1H), 7.62-7.56 (m, 3H), 7.28-7.24 (m, 2H), 4.18 (q, *J* = 7.2 Hz, 2H), 2.75 (s, 3H), 2.40 (s, 3H), 1.07 (t, *J* = 7.2 Hz, 3H); 13C NMR (100 MHz, CDCl3): *δ* 169.3, 156.2, 147.3, 142.5, 138.6, 137.8, 130.3, 130.2, 129.1, 128.3, 127.5, 126.8, 126.0, 124.1, 61.5, 21.3, 15.7, 13.7. HRMS calcd for C20H20NO2+ [M+H]+: 306.1494, found 306.1492.

Ethyl 2-(4-bromophenyl)-4-methylquinoline-3-carboxylate (**3q**). Light yellow oil. Yield: 83%. 1H NMR (400 MHz, CDCl3): *δ* 8.14 (d, *J* = 8.8 Hz, 1H), 8.08 (d, *J* = 8.4 Hz, 1H), 7.79-7.75 (m, 1H), 7.65-7.55 (m, 5H), 4.19 (q, *J* = 7.2 Hz, 2H), 2.76 (s, 3H), 1.09 (t, *J* = 7.2 Hz, 3H); 13C NMR (100 MHz, CDCl3): *δ* 169.0, 154.9, 147.3, 143.0, 139.6, 131.5, 130.5, 130.3, 130.1, 127.2, 126.2, 124.2, 123.2, 61.7, 15.7, 13.8. HRMS calcd for C19H17BrNO2+ [M+H]+: 370.0443, found 370.0438.

Ethyl 4-methyl-2-(4-nitrophenyl)quinoline-3-carboxylate (**3r**). Light yellow solid. Yield: 76%. Mp 88–90 °C. 1H NMR (400 MHz, CDCl3): *δ* 8.35-8.31 (m, 2H), 8.16 (d, *J* = 8.4 Hz, 1H), 8.11 (t, *J* = 8.4 Hz, 1H), 7.90-7.86 (m, 2H), 7.84-7.79 (m, 1H), 7.70-7.65 (m, 1H), 4.20 (q, *J* = 7.2 Hz, 2H), 2.80 (s, 3H), 1.09 (t, *J* = 7.2 Hz, 3H); 13C NMR (100 MHz, CDCl3): *δ* 168.6, 153.8, 148.0, 147.2, 146.9, 143.7, 130.9, 130.4, 129.6, 129.3, 127.8, 126.5, 124.3, 123.6, 61.9, 15.8, 13.8. HRMS calcd for C19H17N2O4+ [M+H]+: 337.1188, found 337.1196.

Ethyl 4-methyl-2-(naphthalen-1-yl)quinoline-3-carboxylate (**3s**). Light yellow solid. Yield: 85%. Mp 116–118 °C. 1H NMR (400 MHz, CDCl3): *δ* 8.20 (d, *J* = 8.4 Hz, 1H), 8.15 (dd, *J* = 8.4, 0.8 Hz, 1H), 7.93-7.85 (m, 2H), 7.81-7.78 (m, 1H), 7.71-7.64 (m, 2H), 7.54-7.50 (m, 2H), 7.48-7.44 (m, 1H), 7.42-7.39 (m, 1H), 3.79 (q, *J* = 7.2 Hz, 2H), 2.81 (s, 3H), 0.53 (t, *J* = 7.2 Hz, 3H); 13C NMR (100 MHz, CDCl3): *δ* 168.3, 156.3, 147.1, 142.8, 137.9, 133.7, 131.8, 130.5, 130.4, 129.0, 128.8, 128.0, 127.2, 126.7, 126.4, 126.3, 126.1, 126.0, 124.9, 124.2, 61.2, 15.8, 13.1. HRMS calcd for C23H20NO2+ [M+H]+: 342.1494, found 342.1483.

Ethyl 2,4-dimethylquinoline-3-carboxylate (**3t**).[4] Light yellow oil. Yield: 89%. 1H NMR (400 MHz, CDCl3): *δ* 8.02 (d, *J* = 8.4 Hz, 1H), 8.00-7.98 (m, 1H), 7.73-7.68 (m, 1H), 7.56-7.52 (m, 1H), 4.49 (q, *J* = 7.2 Hz, 2H), 2.71 (s, 3H), 2.66 (s, 3H), 1.44 (t, *J* = 7.2 Hz, 3H); 13C NMR (100 MHz, CDCl3): *δ* 169.2, 154.4, 147.2, 141.4, 130.0, 129.3, 128.0, 126.3, 125.8, 124.0, 61.7, 23.8, 15.7, 14.3.

Methyl 4-methyl-2-(3-phenylpropyl)quinoline-3-carboxylate (**3u**). Light yellow oil. Yield: 88%. 1H NMR (400 MHz, CDCl3): *δ* 8.04 (d, *J* = 8.4 Hz, 1H), 8.00-7.98 (m, 1H), 7.73-7.69 (m, 1H), 7.56-7.52 (m, 1H), 7.30-7.17 (m, 5H), 3.85 (s, 3H), 2.96-2.91 (m, 2H), 2.74 (t, *J* = 7.6 Hz, 2H), 2.62 (s, 3H), 2.18-2.10 (m, 2H); 13C NMR (100 MHz, CDCl3): *δ* 169.7, 157.7, 147.3, 142.1, 141.6, 130.0, 129.5, 128.6, 128.3, 127.7, 126.3, 125.8, 124.0, 52.4, 36.8, 35.9, 31.1, 15.8. HRMS calcd for C21H22NO2+ [M+H]+: 320.1651, found 320.1657.

Methyl 2-cyclopropyl-4-methylquinoline-3-carboxylate (**3v**). Light yellow oil.Yield: 80%. 1H NMR (400 MHz, CDCl3): *δ* 7.96-7.91 (m, 2H), 7.67-7.62 (m, 1H), 7.49-7.44 (m, 1H), 4.01 (s, 3H), 2.62 (s, 3H), 2.11-2.05 (m, 1H), 1.31-1.26 (m, 2H), 1.04-0.98 (m, 2H); 13C NMR (100 MHz, CDCl3): *δ* 170.0, 158.0, 147.5, 140.6, 129.8, 129.5, 128.0, 125.8, 125.6, 123.9, 52.5, 15.8, 15.6, 9.9. HRMS calcd for C15H16NO2+ [M+H]+: 242.1181, found 242.1175.

1-(2,4-Diphenylquinolin-3-yl)ethan-1-one (**3w**)**.**[5] Light yellow solid. Yield: 73%. Mp 103–105 °C.1H NMR (400 MHz, CDCl3): *δ* 8.23 (d, *J* = 8.4 Hz, 1H), 7.78-7.74 (m, 1H), 7.70-7.65 (m, 2H), 7.59-7.56 (m, 1H), 7.54-7.42 (m, 7H), 7.39-7.35 (m, 2H), 1.90 (s, 3H); 13C NMR (100 MHz, CDCl3): *δ* 204.6, 155.2, 147.6, 145.4, 140.1, 135.3, 130.4, 129.8, 129.2, 129.1, 129.0, 128.7, 128.6, 128.5, 128.1, 127.1, 126.6, 125.9, 32.8.

Ethyl 2-(naphthalen-1-yl)-4-phenylquinoline-3-carboxylate (**3x**). Light yellow solid. Yield: 82%. Mp 126–128 °C. 1H NMR (400 MHz, CDCl3): *δ* 8.25 (d, *J* = 8.4 Hz, 1H), 7.92 (d, *J* = 8.0 Hz, 1H), 7.88 (d, *J* = 8.0 Hz, 1H), 7.81-7.74 (m, 2H), 7.73 (d, *J* = 7.6 Hz, 1H), 7.61-7.58 (m, 1H), 7.56-7.42 (m, 9H), 3.56 (q, *J* = 7.2 Hz, 2H), 0.46 (t, *J* = 7.2 Hz, 3H); 13C NMR (100 MHz, CDCl3): *δ* 167.4, 156.2, 147.7, 147.0, 137.5, 135.6, 133.7, 131.8, 130.6, 129.9, 129.5, 129.0, 128.6, 128.3, 128.1, 127.3, 127.0, 126.7, 126.3, 126.1, 125.9, 125.7, 124.9, 60.9, 13.1. HRMS calcd for C28H22NO2+ [M+H]+: 404.1651, found 404.1647.

**References**

[1] Zheng, J.; Li, Z.; Huang, L.; Wu, W.; Li, J.; Jiang, H. *Org. Lett.* **2016**, *18*, 3514-3517.

[2] Cai, S.; Zeng, J.; Bai, Y.; Liu, X.-W. *J. Org. Chem.* **2012**, *77*, 801-807.

[3] Sridharan, V.; Ribelles, P.; Ramos, M. T.; Menendez, J. C. *J. Org. Chem.* **2009**, *74*, 5715-5718.

[4] Genovese, S.; Epifano, F.; Marcotullio, M. C.; Pelucchini, C.; Curini, M. *Tetrahedron Lett.* **2011**, *52*, 3474-3477.

[5] Enugala, R.; Nuvvula, S.; Kotra, V.; Varala, R.; Adapa, S. R. *Heterocycles* **2008**, *75*, 2523-2533.

Copies of 1H NMR and 13C NMR spectra of compounds **3a-3x**.

1H NMR and 13C NMR spectra of compound **3a**

1H NMR and 13C NMR spectra of compound **3b**

1H NMR and 13C NMR spectra of compound **3c**

1H NMR and 13C NMR spectra of compound **3d**

1H NMR and 13C NMR spectra of compound **3e**

1H NMR and 13C NMR spectra of compound **3f**

1H NMR and 13C NMR spectra of compound **3g**

1H NMR and 13C NMR spectra of compound **3h**

1H NMR and 13C NMR spectra of compound **3i**

1H NMR and 13C NMR spectra of compound **3j**

1H NMR and 13C NMR spectra of compound **3k**

1H NMR and 13C NMR spectra of compound **3l**

1H NMR and 13C NMR spectra of compound **3m**

1H NMR and 13C NMR spectra of compound **3n**

1H NMR and 13C NMR spectra of compound **3o**

1H NMR and 13C NMR spectra of compound **3p**

1H NMR and 13C NMR spectra of compound **3q**

1H NMR and 13C NMR spectra of compound **3r**

1H NMR and 13C NMR spectra of compound **3s**

1H NMR and 13C NMR spectra of compound **3t**

1H NMR and 13C NMR spectra of compound **3u**

1H NMR and 13C NMR spectra of compound **3v**

1H NMR and 13C NMR spectra of compound **3w**

1H NMR and 13C NMR spectra of compound **3x**
